# Supplementary material for: Systematic Assessment on Waterlogging Control Facilities in Hefei City of Anhui Province in East China
Source: MDPI journal article supplement (doi:10.3390/w16040620), 2024-02-19
Supplement: s1 [file s1]

## **Supplementary Material**

### **Systematic assessment on waterlogging control facilities in Hefei City of Anhui Province in east China**

Hao Hu<sup>1,2,#,\*</sup>, Yan-Kun Liu<sup>1,#,\*</sup>, Jian-Kang Du<sup>3</sup>, Rong-Qiong Liu<sup>4</sup>, Bang-Lei WU<sup>1</sup>,  
Qing-Wei Zeng<sup>1</sup>

<sup>1</sup> Anhui Provincial Key Laboratory of Environmental Pollution Control and Resource Reuse, School of Environment and Energy Engineering, Anhui Jianzhu University, Hefei 230601, P.R. China

<sup>2</sup> CAS Key Laboratory of Urban Pollutant Conversion, Department of Environmental Science and Engineering, University of Science and Technology of China, Hefei 230026, P.R. China

<sup>3</sup> Hefei Planning and Design Institute, Hefei 230041, P.R. China

<sup>4</sup> College of Ecology and Environment, Anhui Normal University, Wuhu 241002, P.R. China

\*: Corresponding author

Dr. Hao Hu

Fax: +86 551-63828251

Email: huhao2019@ustc.edu.cn

\*\*: Correspondence author

Mr. Yan-kun Liu

Fax: +86 551-63828252

Email: liuyankun@stu.ahjzu.edu.cn

# These authors contributed to the work equally and should be regarded as co-first

authors.

There are 14 pages totally in supplementary material including 6 tables and 3 figures.

**Table S1** Information about the pipes before and after renovation in this area. The material for pipes before and after renovation is high density polyethylene (HD-PE).

| Pipe | Initial node | Ending node | Function | Shape    | Length (m) | Slope  | Original Diameter (mm) | Renovated Diameter (mm) |
|------|--------------|-------------|----------|----------|------------|--------|------------------------|-------------------------|
| GQ1  | J1           | J2          | Storm    | Circular | 32.0       | 0.0031 | 250                    | 315                     |
| GQ2  | J3           | J4          | Storm    | Circular | 33.3       | 0.0015 | 250                    | 315                     |
| GQ3  | J2           | J4          | Storm    | Circular | 21.2       | 0.0023 | 315                    | 315                     |
| GQ4  | J4           | J5          | Storm    | Circular | 39.5       | 0.0954 | 250                    | 315                     |
| GQ5  | J5           | J10         | Storm    | Circular | 39.5       | 0.0063 | 300                    | 400                     |
| GQ6  | J10          | J9          | Storm    | Circular | 34.3       | 0.0143 | 300                    | 400                     |
| GQ7  | J6           | J7          | Storm    | Circular | 65.9       | 0.0093 | 250                    | 315                     |
| GQ8  | J8           | J7          | Storm    | Circular | 42.5       | 0.0202 | 250                    | 315                     |
| GQ9  | J7           | J9          | Storm    | Circular | 19.3       | 0.0098 | 315                    | 315                     |
| GQ10 | J11          | J9          | Storm    | Circular | 27.7       | 0.0181 | 250                    | 315                     |
| GQ11 | J17          | J16         | Storm    | Circular | 40.0       | 0.0030 | 250                    | 315                     |
| GQ12 | J9           | J16         | Storm    | Circular | 17.0       | 0.0106 | 400                    | 500                     |
| GQ13 | J16          | J18         | Storm    | Circular | 28.6       | 0.0109 | 400                    | 500                     |
| GQ14 | J19          | J18         | Storm    | Circular | 25.6       | 0.0265 | 250                    | 315                     |
| GQ16 | J18          | J21         | Storm    | Circular | 31.0       | 0.0061 | 400                    | 500                     |
| GQ17 | J13          | J12         | Storm    | Circular | 63.5       | 0.0032 | 250                    | 315                     |
| GQ18 | J12          | J21         | Storm    | Circular | 30.5       | 0.0482 | 250                    | 315                     |
| GQ19 | J14          | J15         | Storm    | Circular | 20.0       | 0.0125 | 250                    | 315                     |
| GQ20 | J15          | J22         | Storm    | Circular | 33.8       | 0.0047 | 250                    | 315                     |
| GQ21 | J22          | J21         | Storm    | Circular | 12.0       | 0.1133 | 315                    | 315                     |
| GQ22 | J23          | J24         | Storm    | Circular | 66.2       | 0.0251 | 250                    | 315                     |
| GQ23 | J21          | J24         | Storm    | Circular | 28.0       | 0.0032 | 500                    | 600                     |
| GQ24 | J24          | J25         | Storm    | Circular | 10.1       | 0.0029 | 500                    | 600                     |
| GQ25 | J25          | J26         | Storm    | Circular | 10.0       | 0.0030 | 500                    | 600                     |
| GQ26 | J26          | J27         | Storm    | Circular | 14.5       | 0.0069 | 500                    | 600                     |
| GQ27 | J30          | J25         | Storm    | Circular | 68.4       | 0.0152 | 250                    | 315                     |
| GQ28 | J28          | J26         | Storm    | Circular | 50.3       | 0.0243 | 250                    | 315                     |
| GQ29 | J29          | J27         | Storm    | Circular | 50.3       | 0.0263 | 250                    | 315                     |
| GQ30 | J31          | J26         | Storm    | Circular | 61.8       | 0.0238 | 315                    | 315                     |
| GQ31 | J32          | J27         | Storm    | Circular | 84.7       | 0.0191 | 250                    | 315                     |
| GQ32 | J27          | J33         | Storm    | Circular | 19.0       | 0.0053 | 500                    | 600                     |
| GQ33 | J34          | J33         | Storm    | Circular | 98.2       | 0.0241 | 250                    | 315                     |
| GQ36 | J36          | J38         | Storm    | Circular | 51.5       | 0.0041 | 250                    | 315                     |
| GQ37 | J37          | J39         | Storm    | Circular | 70.5       | 0.0217 | 250                    | 315                     |
| GQ38 | J38          | J39         | Storm    | Circular | 11.0       | 0.0036 | 315                    | 315                     |
| GQ39 | J39          | J40         | Storm    | Circular | 27.0       | 0.0529 | 350                    | 400                     |
| GQ40 | J41          | J40         | Storm    | Circular | 10.0       | 0.0260 | 250                    | 315                     |
| GQ41 | J40          | J42         | Storm    | Circular | 25.0       | 0.0040 | 350                    | 400                     |

| <b>Pipe</b> | <b>Initial<br/>node</b> | <b>Ending<br/>node</b> | <b>Function</b> | <b>Shape</b> | <b>Length<br/>(m)</b> | <b>Slope</b> | <b>Original<br/>Diameter (mm)</b> | <b>Renovated<br/>Diameter (mm)</b> |
|-------------|-------------------------|------------------------|-----------------|--------------|-----------------------|--------------|-----------------------------------|------------------------------------|
| GQ42        | J45                     | J44                    | Storm           | Circular     | 31.0                  | 0.0029       | 250                               | 315                                |
| GQ43        | J43                     | J44                    | Storm           | Circular     | 82.6                  | 0.0041       | 250                               | 315                                |
| GQ44        | J44                     | J46                    | Storm           | Circular     | 18.5                  | 0.0086       | 250                               | 315                                |
| GQ45        | J47                     | J46                    | Storm           | Circular     | 27.3                  | 0.0165       | 250                               | 315                                |
| GQ46        | J48                     | J46                    | Storm           | Circular     | 58.2                  | 0.0077       | 250                               | 315                                |
| GQ47        | J46                     | J49                    | Storm           | Circular     | 13.5                  | 0.0104       | 350                               | 400                                |
| GQ48        | J50                     | J49                    | Storm           | Circular     | 19.2                  | 0.0307       | 250                               | 315                                |
| GQ49        | J49                     | J51                    | Storm           | Circular     | 31.8                  | 0.0031       | 400                               | 500                                |
| GQ50        | J51                     | J52                    | Storm           | Circular     | 14.3                  | 0.0028       | 400                               | 500                                |
| GQ51        | J52                     | J53                    | Storm           | Circular     | 15.0                  | 0.0093       | 400                               | 500                                |
| GQ52        | J54                     | J51                    | Storm           | Circular     | 20.0                  | 0.0145       | 250                               | 315                                |
| GQ53        | J42                     | J55                    | Storm           | Circular     | 35.0                  | 0.0040       | 350                               | 400                                |
| GQ54        | J55                     | J53                    | Storm           | Circular     | 55.0                  | 0.0112       | 350                               | 400                                |
| GQ55        | J56                     | J57                    | Storm           | Circular     | 10.0                  | 0.0290       | 315                               | 315                                |
| GQ56        | J53                     | J57                    | Storm           | Circular     | 30.0                  | 0.0040       | 500                               | 600                                |
| GQ57        | J57                     | PFK2                   | Storm           | Circular     | 5.0                   | 0.0210       | 500                               | 600                                |
| GQ58        | J33                     | J58                    | Storm           | Circular     | 47.0                  | 0.0029       | 600                               | 700                                |
| GQ59        | J58                     | PFK1                   | Storm           | Circular     | 10.0                  | 0.0440       | 600                               | 700                                |

**Table S2** Area size and proportion of sponge facilities in the study area

| Sponge facilities     | Area of sponge facilities (m <sup>2</sup> ) | Proportion of sponge facilities in study area (%) |
|-----------------------|---------------------------------------------|---------------------------------------------------|
| Infiltration road     | 1707.2                                      | 4.4                                               |
| Planting ditch        | 1202.8                                      | 3.1                                               |
| Permeable pavement    | 2871.2                                      | 7.4                                               |
| Permeable parking lot | 2250.4                                      | 5.8                                               |
| Total                 | 8031.6                                      | 20.7                                              |

**Table S3** Infiltration rate and geological characteristics in the study area.

| <b>Foundation geological character</b> | <b>Thickness (m)</b> | <b>Bottom altitude (m)</b> | <b>Maximum infiltration rate (mm/h)</b> | <b>Minimum infiltration rate (mm/h)</b> |
|----------------------------------------|----------------------|----------------------------|-----------------------------------------|-----------------------------------------|
| Layer miscellaneous fill               | 0.30~4.30            | 7.32~29.18                 | 64.8                                    | 3.24                                    |
| Layer silty clay                       | 0.60~3.10            | 4.22~26.83                 | 2.52                                    | 0.36                                    |
| Layer clay                             | Not drilled through  | —                          | 0.18                                    | 0.01                                    |

Note: The measured altitude is altitude system of Wusong of China.

**Table S4** The curve integral areas of the rainwater depth over elapsed time of key nodes.

| Key Nodes                                       | J5   | J18  | J21  | J24  | J25  | J33  |
|-------------------------------------------------|------|------|------|------|------|------|
| 20-a return period<br>without sponge facilities | 0.65 | 2.01 | 2.11 | 1.83 | 1.74 | 0.85 |
| 20-a return period with<br>sponge facilities    | 0.28 | 1.41 | 1.75 | 1.36 | 1.38 | 0.72 |
| 50-a return period<br>without sponge facilities | 1.85 | 1.52 | 2.61 | 2.49 | 2.47 | 0.95 |
| 50-a return period with<br>sponge facilities    | 0.76 | 2.41 | 2.52 | 2.12 | 2.01 | 0.84 |

The bottom areas of the rainwater wells at these key nodes were the same as each other and was set 1 unit. The accumulated rainwater volume  $(V) = \int 1 \times h dt = \int 1 \times h dt$ , in which  $h$  means rainwater depth in well,  $t$  means elapsed time, and which was coincidentally the curve integral areas of the rainwater depth over elapsed time.

**Table S5** The four flow parameters of two outlets (PFK1 and PFK2) variation after renovation with and without sponge facilities

| Return period | Outfall Nodes | Programme                           | Water flow frequency Percentage (%) | Average flow rate (m <sup>3</sup> /s) | Peak flow (m <sup>3</sup> /s) | Total emissions (m <sup>3</sup> ) |
|---------------|---------------|-------------------------------------|-------------------------------------|---------------------------------------|-------------------------------|-----------------------------------|
| 2a            | PFK1          | No sponge measures after renovation | 57.79                               | 0.210                                 | 0.487                         | 903                               |
|               |               | Renovation with sponge facilities   | 52.14                               | 0.187                                 | 0.436                         | 649                               |
|               |               | Reduction                           | 5.65                                | 0.023                                 | 0.051                         | 254                               |
|               |               | Percentage reduction %              | 9.78                                | 10.95                                 | 10.47                         | 28.13                             |
|               | PFK2          | No sponge measures after renovation | 57.67                               | 0.098                                 | 0.228                         | 423                               |
|               |               | Renovation with sponge facilities   | 50.91                               | 0.086                                 | 0.159                         | 292                               |
|               |               | Reduction                           | 6.76                                | 0.012                                 | 0.069                         | 131                               |
|               |               | Percentage reduction %              | 11.72                               | 12.24                                 | 30.26                         | 30.97                             |
| 5a            | PFK1          | No sponge measures after renovation | 63.36                               | 0.300                                 | 0.727                         | 1276                              |
|               |               | Renovation with sponge facilities   | 58.57                               | 0.297                                 | 0.629                         | 1006                              |
|               |               | Reduction                           | 4.79                                | 0.030                                 | 0.098                         | 270                               |
|               |               | Percentage reduction %              | 7.56                                | 10.00                                 | 13.48                         | 21.63                             |
|               | PFK2          | No sponge measures after renovation | 63.26                               | 0.140                                 | 0.341                         | 597                               |
|               |               | Renovation with sponge facilities   | 57.57                               | 0.138                                 | 0.298                         | 457                               |
|               |               | Reduction                           | 5.69                                | 0.02                                  | 0.043                         | 140                               |
|               |               | Percentage reduction %              | 8.99                                | 14.3                                  | 12.61                         | 23.45                             |
| 10a           | PFK1          | No sponge measures after renovation | 66.03                               | 0.356                                 | 0.857                         | 1551                              |
|               |               | Renovation with sponge facilities   | 61.83                               | 0.310                                 | 0.760                         | 1270                              |
|               |               | Reduction                           | 4.20                                | 0.046                                 | 0.097                         | 281                               |
|               |               | Percentage reduction %              | 6.36                                | 12.92                                 | 11.32                         | 18.12                             |
|               | PFK2          | No sponge measures after renovation | 65.96                               | 0.166                                 | 0.413                         | 726                               |



|     |      |                                     |       |       |       |       |
|-----|------|-------------------------------------|-------|-------|-------|-------|
|     |      | Renovation with sponge facilities   | 60.94 | 0.148 | 0.358 | 579   |
|     |      | Reduction                           | 5.02  | 0.018 | 0.055 | 147   |
|     |      | Percentage reduction %              | 7.61  | 10.84 | 13.32 | 20.25 |
| 20a | PFK1 | No sponge measures after renovation | 68.14 | 0.410 | 1.041 | 1839  |
|     |      | Renovation with sponge facilities   | 64.39 | 0.366 | 0.897 | 1536  |
|     |      | Reduction                           | 3.75  | 0.044 | 0.144 | 303   |
|     |      | Percentage reduction %              | 5.50  | 10.73 | 13.83 | 16.48 |
|     | PFK2 | No sponge measures after renovation | 68.07 | 0.192 | 0.548 | 861   |
|     |      | Renovation with sponge facilities   | 63.58 | 0.155 | 0.434 | 705   |
|     |      | Reduction                           | 4.49  | 0.037 | 0.114 | 156   |
|     |      | Percentage reduction %              | 6.60  | 19.28 | 20.80 | 18.12 |
| 50a | PFK1 | No sponge measures after renovation | 70.37 | 0.463 | 1.156 | 2175  |
|     |      | Renovation with sponge facilities   | 67.04 | 0.418 | 1.074 | 1846  |
|     |      | Reduction                           | 3.33  | 0.045 | 0.082 | 329   |
|     |      | Percentage reduction %              | 4.73  | 9.72  | 7.09  | 15.13 |
|     | PFK2 | No sponge measures after renovation | 70.31 | 0.221 | 0.686 | 1035  |
|     |      | Renovation with sponge facilities   | 66.33 | 0.194 | 0.543 | 864   |
|     |      | Reduction                           | 3.98  | 0.027 | 0.143 | 171   |
|     |      | Percentage reduction %              | 5.66  | 12.22 | 20.85 | 16.52 |

**Table S6** The measured and predicted flow rates of two discharge outlets (PFK1 and PFK2).

|      |               | <b>Flow rates from model (m<sup>3</sup>/s)</b> | <b>Measured flow rates (m<sup>3</sup>/s)</b> | <b>Relative error (%)</b> |
|------|---------------|------------------------------------------------|----------------------------------------------|---------------------------|
| PFK1 | 2 year period | 0.210                                          | 0.230                                        | 9.5                       |
|      | 5 year period | 0.300                                          | 0.230                                        | 23.3                      |
| PFK2 | 2 year period | 0.098                                          | 0.101                                        | 3.0                       |
|      | 5 year period | 0.140                                          | 0.101                                        | 27.9                      |

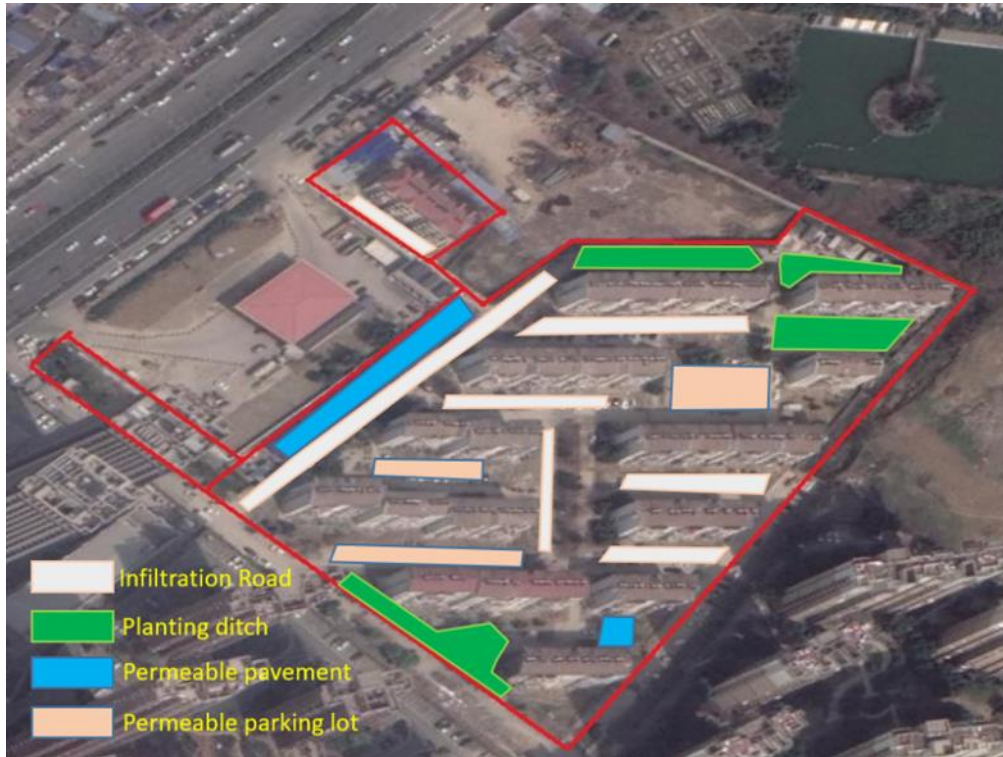

**Figure S1.** The layout of sponge facilities in this study area

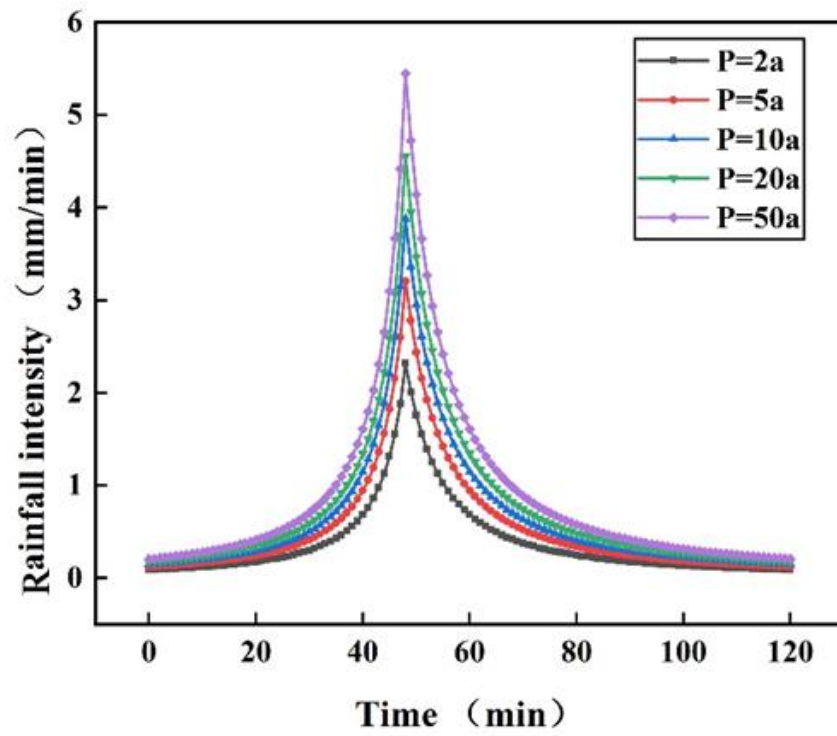

**Figure S2.** Rain intensity under different return periods by the Chicago Rain Typer



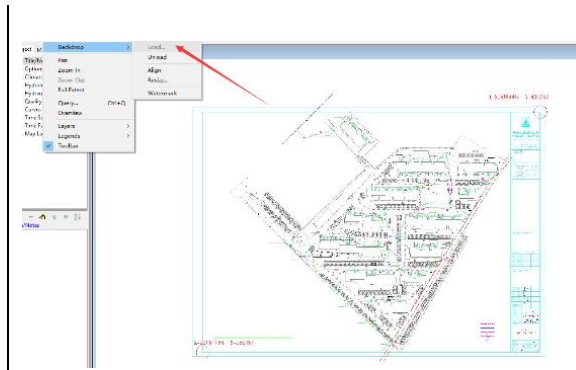

(1) Conversion to JPG format,

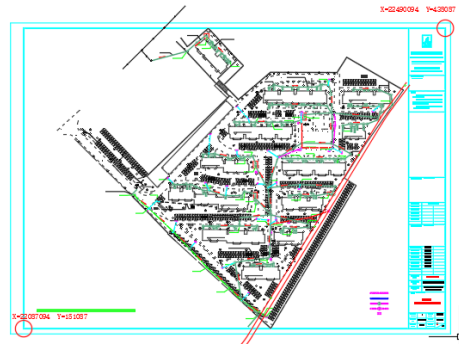

(2) Import into SWMM

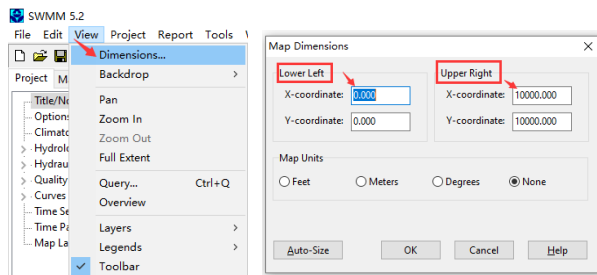

(3) Registration

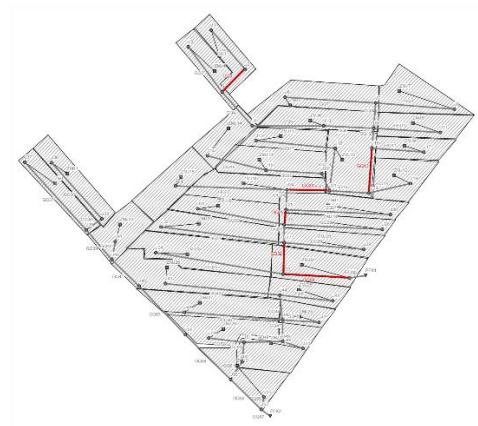

(4) Generalization
